# Supplementary material for: Organic solar cells based on bowl-shaped small-molecules
Source: Royal Society of Chemistry journal article supplement (doi:10.1039/c5ra02073e), 2015-01-01
Supplement: c5ra02073e1.pdf [file c5ra02073e1.pdf]

# Electronic Supplementary Information

## Organic solar cells based on bowl-shape small-molecules

Agustín Molina-Ontoria,<sup>a</sup> María Gallego,<sup>c</sup> Luís Echegoyen,<sup>a\*</sup> Emilio M. Pérez<sup>b</sup> and Nazario Martín<sup>bc\*</sup>

<sup>a</sup> Department of Chemistry, University of Texas at El Paso, 79968, El Paso, Texas (USA).

<sup>b</sup> IMDEA-nanociencia, C/Faraday 9, Ciudad Universitaria de Cantoblanco, 28049 Madrid (Spain)

<sup>c</sup> Departamento de Química Orgánica, Fac. C.C. Químicas, Universidad Complutense de Madrid, Av. Complutense s/n, 28040 Madrid (Spain)

Homepage: <http://www.ucm.es/info/fullerene/>

### Experimental Section

#### Instrumentation

Solvents were purchased from Sigma-Aldrich and were used without further purification. TruxTTF and truxTTF-CO were prepared according to previously reported synthetic procedures (ref 37 and 38). Absorption studies were performed using a Cary 5000 UV-Vis-NIR spectrometer from Varian. The thickness of blends were measured by employing a KLA-Tencor Alpha-Step D-120 stylus profilometer. Atomic Force Microscopy was performed on a SPM Nanoscope IIIa multimode microscope working in tapping mode under ambient conditions.

## Solar cell fabrication

PC<sub>61</sub>BM and PC<sub>71</sub>BM were purchased from American Dye Source and used as received. The ITO-coated glasses (Delta technologies, 5-15  $\Omega$ ) were pre-cleaned stepwise by ultracentrifugation 15 minutes in detergent, deionized water, methanol, acetone and iso-propanol and then by a 20 minutes UV-ozone treatment (Jelight Company, USA). A thin layer of PEDOT:PSS (Clevios P VP AI 4083, 5000 rpm, 30 seconds,  $\approx$  30 nm) was spin-coated onto the ITO glass and baked at 150 °C for 15 minutes in air. Subsequently, the active layer with varying weight ratios (1:6, 1:4 and 1:2 w/w) was spin-coated at 900 rpm from chlorobenzene:*o*-DCB (1:3 v/v) solutions. TruxTTF or truxTTF-CO:PC<sub>61</sub>BM or PC<sub>71</sub>BM (1:6, 1:4 and 1:2 w/w) was spin-coated at 900 rpm. Then the devices were transferred to a N<sub>2</sub> filled glove box (< 0.1 ppm O<sub>2</sub> and < 0.1 ppm H<sub>2</sub>O) for further processing. The photoactive layer was annealed at 70 °C for 10 minutes followed by thermal evaporation 60 nm of aluminum ( $1 \times 10^{-6}$  mbar) as negative electrode with a shadow mask of 4 mm<sup>2</sup>. The current-voltage characteristics of the devices were measured by using a computer-controlled Keithley 2420 source unit under 1 sun, AM1.5G spectrum from a solar simulator (Photo Emission Tech CT100) by using a Xenon-lamp at 100 mW cm<sup>-2</sup> as light source and calibrated with a Si-reference cell. The incident photon to current efficiency was recorded using a Bentham PVE300 model.

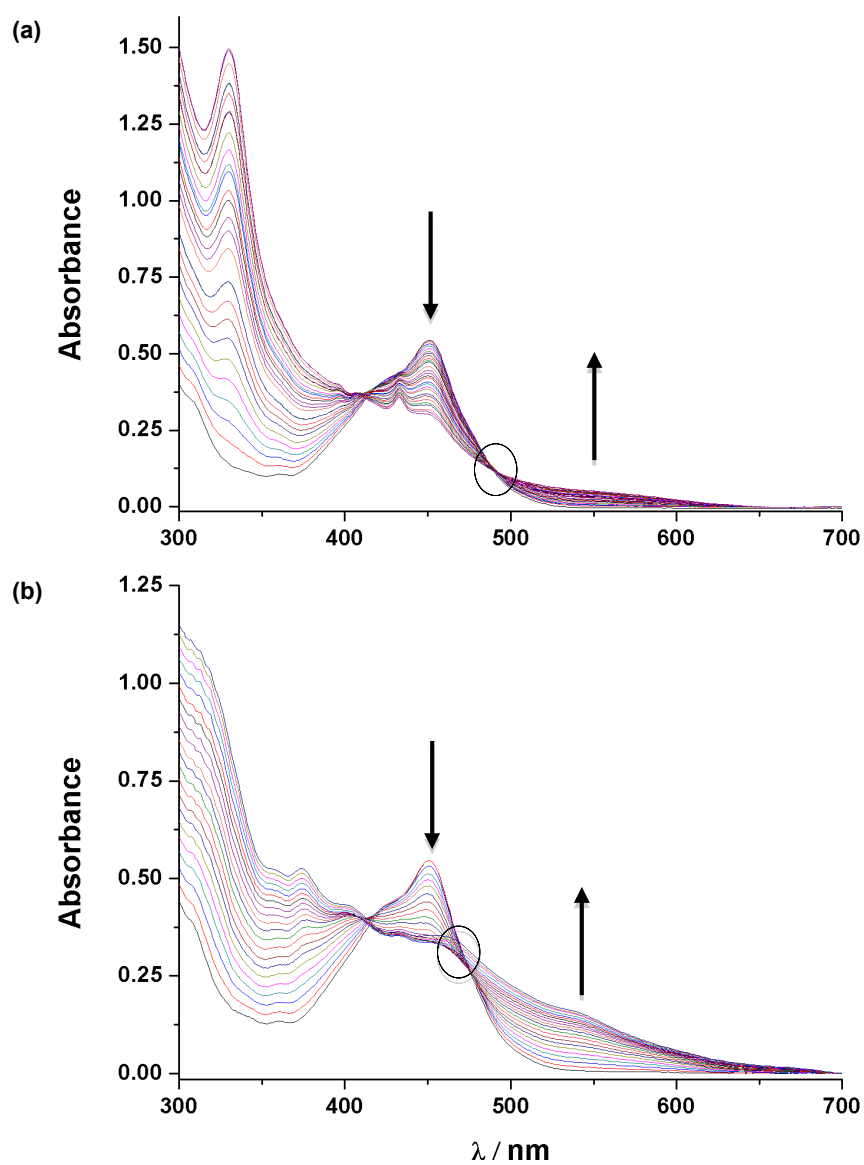

Figure S1. UV/ vis spectra as obtained during the titration of (a) truxTTF ( $1.15 \times 10^{-4}$  M) with PC<sub>61</sub>BM ( $4.9 \times 10^{-4}$  M) and (b) truxTTF ( $1.15 \times 10^{-4}$  M) with PC<sub>71</sub>BM ( $4.37 \times 10^{-4}$  M), in chlorobenzene at room temperature. Each addition corresponds to 0.1 equiv.

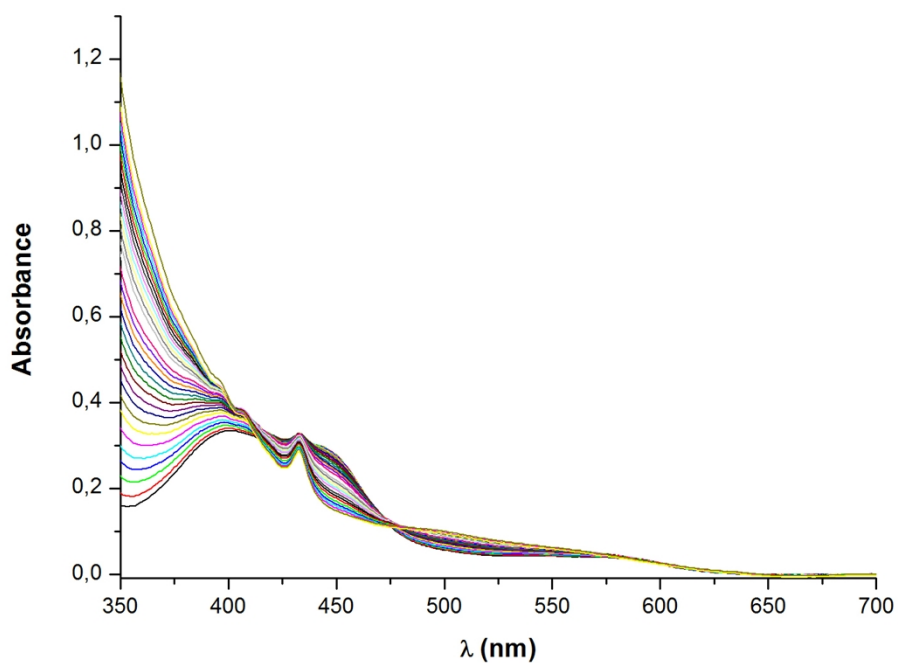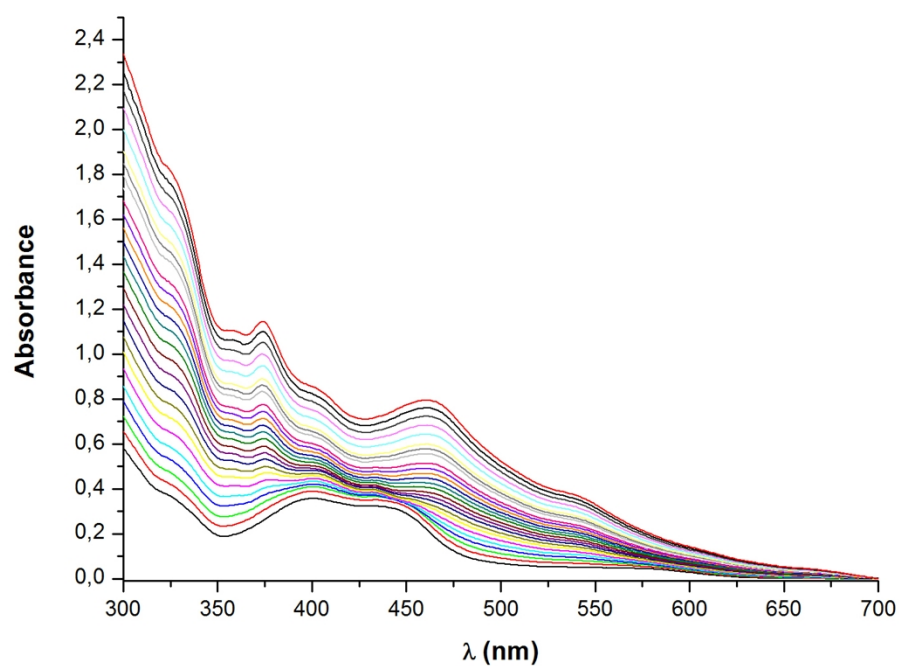

Figure S2. UV/ vis spectra as obtained during the titration of (a) truxTTF-CO ( $1.44 \times 10^{-4}$  M) with PC<sub>61</sub>BM ( $7.14 \times 10^{-4}$  M). Each addition corresponds to 0.2 equiv. (b) truxTTF ( $1.15 \times 10^{-4}$  M) with PC<sub>71</sub>BM ( $7.48 \times 10^{-4}$  M), in chlorobenzene at room temperature. Each addition corresponds to 0.24 equiv.

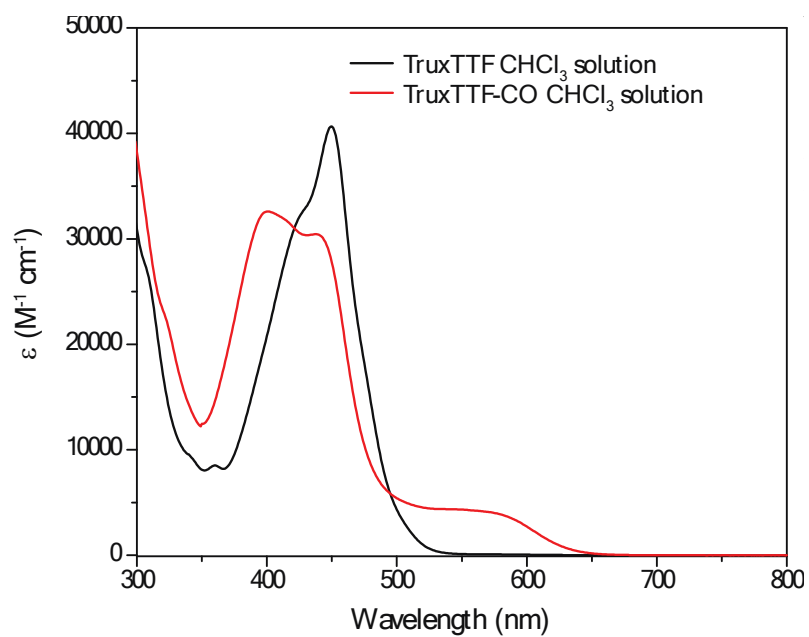

Figure S3. UV-vis absorption spectra of truxTTF and truxTTF-CO in diluted chloroform solutions.

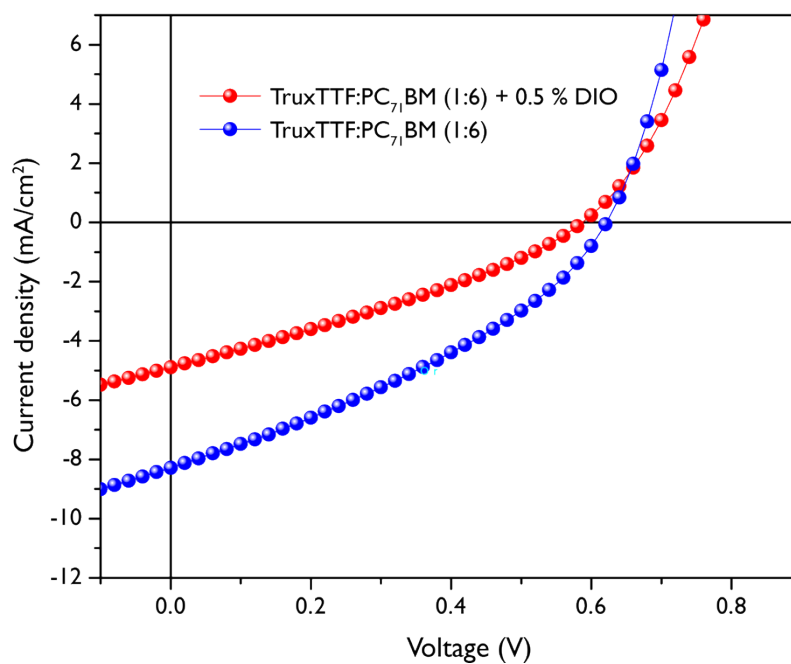

Figure S4. Current density-voltage ( $J$ - $V$ ) curves of the blend truxTTF:PC<sub>71</sub>BM (1:6) w/w with and without DIO.

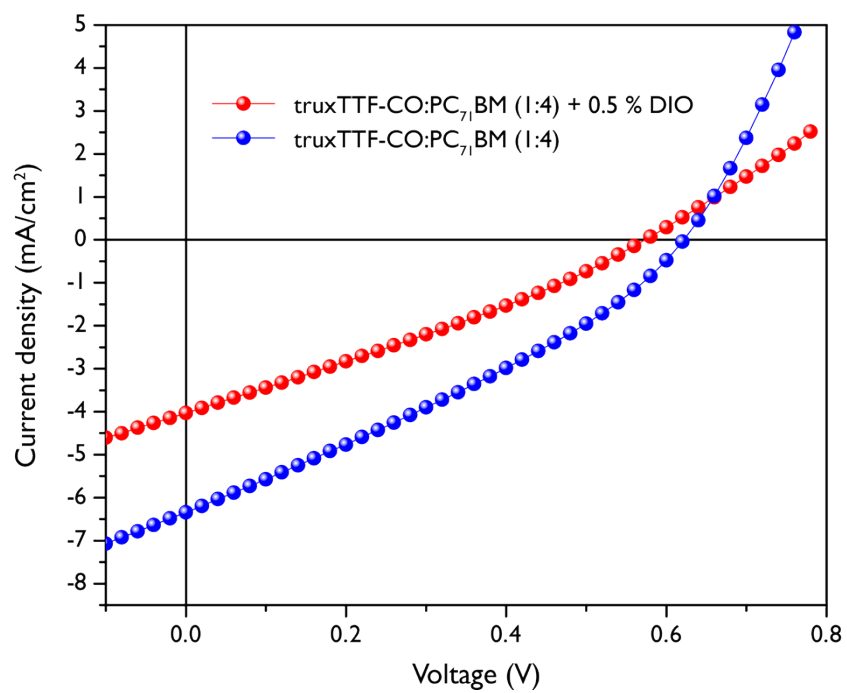

Figure S5. Current density-voltage ( $J$ - $V$ ) curves of the blend truxTTF-CO:PC<sub>71</sub>BM (1:4) w/w with and without DIO.

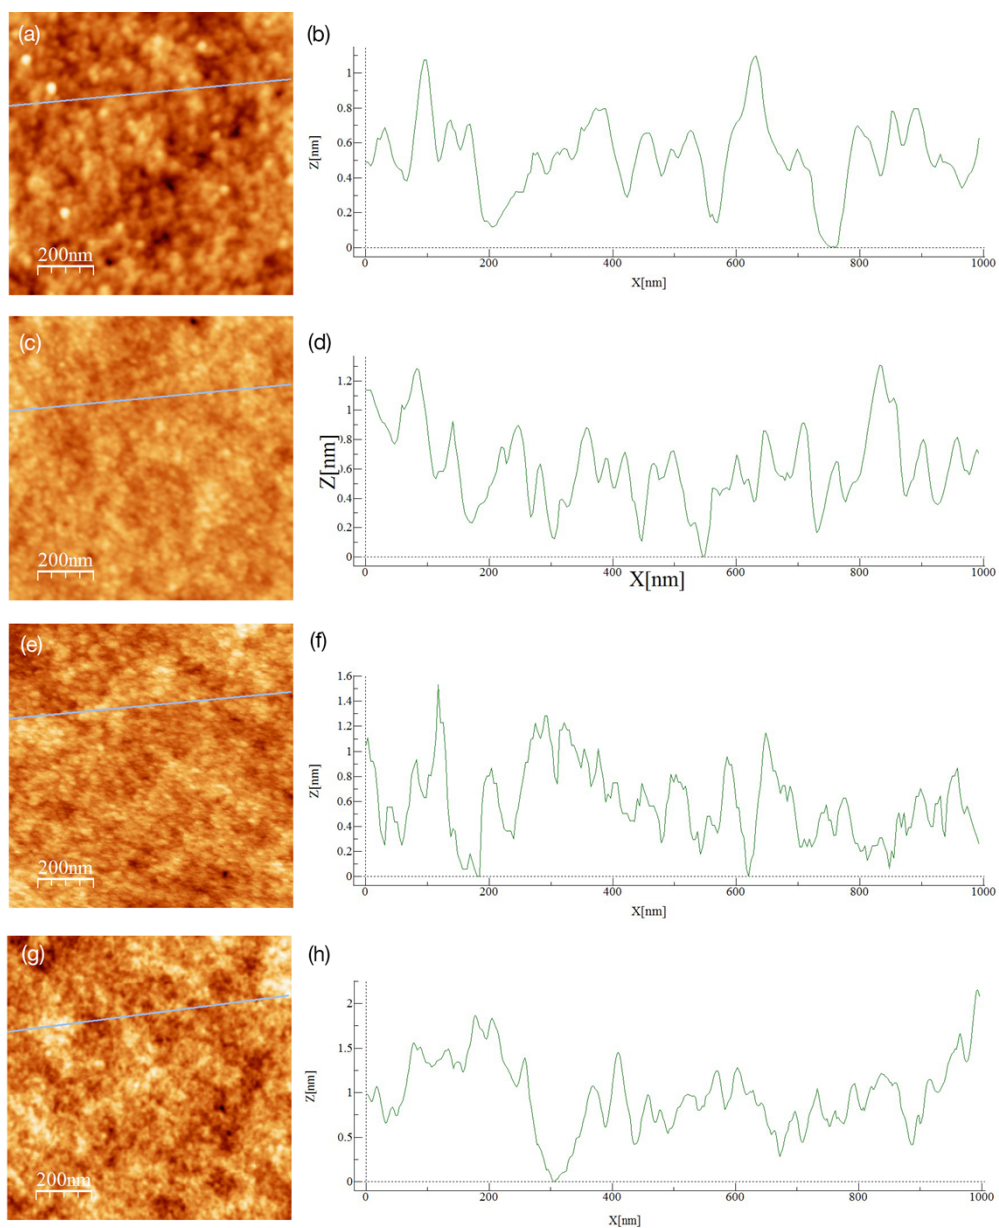

Figure S6. Tapping mode AFM height and their profile roughness ( $1\ \mu\text{m} \times 1\ \mu\text{m}$ ) of blends films spin-coated from chlorobenzene:o-DCB of (a and b) truxTTF:PC<sub>61</sub>BM (1:6), (c and d) truxTTF:PC<sub>71</sub>BM (1:6), (e and f) truxTTF-CO:PC<sub>61</sub>BM (1:4) and (g and h) truxTTF-CO:PC<sub>71</sub>BM (1:4).
